# Supplementary material for: Promoting women’s and children’s health through community groups in low-income and middle-income countries: a mixed-methods systematic review of mechanisms, enablers and barriers
Source: PubMed Central journal article supplement (PMC6936553; doi:10.1136/bmjgh-2019-001972), 2019-12-05
Supplement: bmjgh-2019-001972supp001.pdf [file bmjgh-2019-001972supp001.pdf]

## **Description of individual studies**

| Author(s) and title                                                                                                                                                                                  | Year | Country focus | Health focus | Target population      | Type of article        | Type of intervention                  | Role of community groups                                                                                                                                                                                                                                               | Complementary intervention components                                                                                                                                                                                                                                                  |
|------------------------------------------------------------------------------------------------------------------------------------------------------------------------------------------------------|------|---------------|--------------|------------------------|------------------------|---------------------------------------|------------------------------------------------------------------------------------------------------------------------------------------------------------------------------------------------------------------------------------------------------------------------|----------------------------------------------------------------------------------------------------------------------------------------------------------------------------------------------------------------------------------------------------------------------------------------|
| Biradavolu et al. Structural stigma, sex work and HIV: contradictions and lessons learnt from a community-led structural intervention in southern India                                              | 2012 | India         | HIV/AIDS     | Commercial sex workers | Qualitative study      | Community-led structural intervention | <i>Avahan initiative:</i><br>Community building & formation of sex worker community-based organisations was integral to the community mobilisation part of the intervention                                                                                            | Condom distribution & STI treatment<br>Advocacy with police & media<br>Social Change Agents recruited to act as peer educators & community organizers                                                                                                                                  |
| Blankenship et al. Power, community mobilization, and condom use practices among female sex workers in Andhra Pradesh, India                                                                         | 2008 | India         | HIV/AIDS     | Commercial sex workers | Cross-sectional survey | Community-led structural intervention | <i>Avahan initiative:</i><br>Social Change Agents organize community-based organizations composed of & led by female sex workers                                                                                                                                       | Condom distribution & STI treatment<br>Taking female sex workers to clinics<br>Advocacy on behalf of sex workers<br>Social Change Agents recruited to act as peer educators & community organizers                                                                                     |
| Gaikwad et al. How effective is community mobilisation in HIV prevention among highly diverse sex workers in urban settings? The Aastha intervention experience in Mumbai and Thane districts, India | 2012 | India         | HIV/AIDS     | Commercial sex workers | Cross-sectional survey | Community-led structural intervention | <i>Avahan initiative:</i><br>Initiation of self-help groups, community-based organisations & federations of CBOs<br>Capacity building of community-based organizations on programme & financial management                                                             | Peer educators conducted health promotion activities<br>Negotiation with policy-makers on AIDS control at the state level<br>Sensitisation of police & local goons<br>Legal literacy training<br>Crisis response<br>Networking meetings between bar owners and self-help group leaders |
| Galavotti et al. Navigating the swampy lowland: a framework for evaluating the effect of community mobilisation in female sex workers in Avahan, the India AIDS Initiative.                          | 2012 | India         | HIV/AIDS     | Commercial sex workers | Theory paper           | Community-led structural intervention | <i>Avahan initiative:</i><br>Providing safe spaces for sex workers to gather<br>Support for sex workers to identify issues to tackle as a collective<br>Formalisation & ownership of community groups & networks<br>Capacity building of community-based organizations | Peer-led outreach, referral & education<br>STI & TB treatment & testing<br>Distribution of condoms & needles<br>Crisis response                                                                                                                                                        |

| Author(s) and title                                                                                                                                                         | Year | Country focus | Health focus | Target population      | Type of article        | Type of intervention                  | Role of community groups                                                                                                                                                                                                            | Complementary intervention components                                                                                                                                                                                                                |
|-----------------------------------------------------------------------------------------------------------------------------------------------------------------------------|------|---------------|--------------|------------------------|------------------------|---------------------------------------|-------------------------------------------------------------------------------------------------------------------------------------------------------------------------------------------------------------------------------------|------------------------------------------------------------------------------------------------------------------------------------------------------------------------------------------------------------------------------------------------------|
| Guha et al. Risk reduction and perceived collective efficacy and community support among female sex workers in Tamil Nadu and Maharashtra, India: the importance of context | 2012 | India         | HIV/AIDS     | Commercial sex workers | Cross-sectional survey | Community-led structural intervention | <i>Avahan initiative:</i><br>Regular training & meetings for sex workers, formation of self-help groups and community-based organisations                                                                                           | Peer-led outreach & skills training for sex workers                                                                                                                                                                                                  |
| Kongelf et al. Is Scale-Up of Community Mobilisation among Sex Workers Really Possible in Complex Urban Environments? The Case of Mumbai, India                             | 2015 | India         | HIV/AIDS     | Commercial sex workers | Qualitative study      | Community-led structural intervention | <i>Avahan initiative:</i><br>Peer educator-led community group meetings in safe spaces<br>Training, capacity building & network strengthening of community-based groups facilitating the formation of community-based organisations | Peer-led outreach with emphasis on condom promotion & distribution and enhanced access & uptake of STI screening & treatment<br>Community crisis response                                                                                            |
| Kuhlmann et al. Investing in communities: Evaluating the added value of community mobilization on HIV prevention outcomes among FSWs in India                               | 2014 | India         | HIV/AIDS     | Commercial sex workers | Cross-sectional survey | Community-led structural intervention | <i>Avahan initiative:</i><br>Drop-in centres providing safe meeting spaces for sex workers<br>Sex worker participation in formal & informal community-based organisations                                                           | Peer-led outreach & condom distribution<br>Crisis response<br>Services for STIs<br>Encouraging sex worker participation in programme activities: community mapping & outreach, membership of project committees, management of crisis response teams |
| Nagarajan et al. Female sex worker's participation in the community mobilization process: Two distinct forms of participations and associated contextual factors            | 2014 | India         | HIV/AIDS     | Commercial sex workers | Cross-sectional survey | Community-led structural intervention | <i>Avahan initiative:</i><br>Sex worker participation in self-help groups and formal & informal community-based organisations                                                                                                       | Peer-led outreach, referral & education<br>Crisis response<br>Services for STIs                                                                                                                                                                      |

| Author(s) and title                                                                                                                                                                                                                  | Year | Country focus | Health focus | Target population      | Type of article        | Type of intervention                  | Role of community groups                                                                                                                                                                                                                                               | Complementary intervention components                                                                                           |
|--------------------------------------------------------------------------------------------------------------------------------------------------------------------------------------------------------------------------------------|------|---------------|--------------|------------------------|------------------------|---------------------------------------|------------------------------------------------------------------------------------------------------------------------------------------------------------------------------------------------------------------------------------------------------------------------|---------------------------------------------------------------------------------------------------------------------------------|
| Narayanan et al. Monitoring community mobilisation and organisational capacity among high-risk groups in a large-scale HIV prevention programme in India: selected findings using a Community Ownership and Preparedness Index       | 2012 | India         | HIV/AIDS     | Commercial sex workers | Cross-sectional survey | Community-led structural intervention | <i>Avahan initiative:</i><br>Capacity building of community-based groups focusing on organisational capacity and sustainability                                                                                                                                        | Peer-led behaviour change communication, condom & needle distribution<br>STI treatment and referral to HIV care                 |
| Saggurti et al. Community collectivization and its association with consistent condom use and STI treatment-seeking behaviors among female sex workers and high-risk men who have sex with men/transgenders in Andhra Pradesh, India | 2013 | India         | HIV/AIDS     | Commercial sex workers | Cross-sectional survey | Community-led structural intervention | <i>Avahan initiative:</i><br>Providing safe spaces for sex workers to gather<br>Support for sex workers to identify issues to tackle as a collective<br>Formalisation & ownership of community groups & networks<br>Capacity building of community-based organizations | Peer-led outreach, referral & education<br>STI & TB treatment & testing<br>Distribution of condoms & needles<br>Crisis response |
| Thomas et al. Design of a Community Ownership and Preparedness Index: using data to inform the capacity development of community-based groups                                                                                        | 2012 | India         | HIV/AIDS     | Commercial sex workers | Methodological paper   | Community-led structural intervention | <i>Avahan initiative:</i><br>Support for the formation of community-based groups & organisations<br>Capacity building of community-based groups to manage targeted interventions & conduct advocacy                                                                    | Peer-led behaviour change communication, condom & needle distribution<br>STI treatment and referral to HIV care                 |

| Author(s) and title                                                                                                                                                                                                     | Year | Country focus | Health focus                            | Target population      | Type of article     | Type of intervention                  | Role of community groups                                                                                                                                                                                                                                               | Complementary intervention components                                                                                                                                                                                                                                                                                                         |
|-------------------------------------------------------------------------------------------------------------------------------------------------------------------------------------------------------------------------|------|---------------|-----------------------------------------|------------------------|---------------------|---------------------------------------|------------------------------------------------------------------------------------------------------------------------------------------------------------------------------------------------------------------------------------------------------------------------|-----------------------------------------------------------------------------------------------------------------------------------------------------------------------------------------------------------------------------------------------------------------------------------------------------------------------------------------------|
| Vejella et al. Community Collectivization and Consistent Condom Use Among Female Sex Workers in Southern India: Evidence from Two Rounds of Behavioral Tracking Surveys                                                 | 2016 | India         | HIV/AIDS                                | Commercial sex workers | Cohort study        | Community-led structural intervention | <i>Avahan initiative:</i><br>Providing safe spaces for sex workers to gather<br>Support for sex workers to identify issues to tackle as a collective<br>Formalisation & ownership of community groups & networks<br>Capacity building of community-based organizations | Peer-led outreach, referral & education<br>STI & TB treatment & testing<br>Distribution of condoms & needles<br>Crisis response                                                                                                                                                                                                               |
| Bhattacharjee et al. Understanding the role of peer group membership in reducing HIV-related risk and vulnerability among female sex workers in Karnataka, India                                                        | 2013 | India         | HIV/AIDS & violence against sex workers | Commercial sex workers | Mixed methods study | Community-led structural intervention | <i>Avahan initiative:</i><br>Providing safe spaces for sex workers to gather<br>Support for sex workers to identify issues to tackle as a collective<br>Formalisation & ownership of community groups & networks<br>Capacity building of community-based organizations | Peer-led outreach, referral & education<br>STI & TB treatment & testing<br>Distribution of condoms & needles<br>Crisis response                                                                                                                                                                                                               |
| Beattie et al. Reducing violence and increasing condom use in the intimate partnerships of female sex workers: study protocol for Samvedana Plus, a cluster randomised controlled trial in Karnataka state, south India | 2016 | India         | HIV/AIDS & violence against sex workers | Commercial sex workers | Study protocol      | Community-led structural intervention | Female facilitators engage female sex workers in group-based participatory reflection sessions<br>Capacity building for community-based organization & support for CBO to build alliances                                                                              | Female facilitators counsel sex workers & link them to services & commodities<br>Leadership training for two female sex workers from each reflection group who demonstrate emergent leadership skills<br>One-to-one sessions with intimate partners of female sex workers<br>Couples counselling & couples events<br>Crisis management system |

| Author(s) and title                                                                                                                                                            | Year | Country focus | Health focus | Target population      | Type of article        | Type of intervention                  | Role of community groups                                                                                                                                                                                                                                               | Complementary intervention components                                                                   |
|--------------------------------------------------------------------------------------------------------------------------------------------------------------------------------|------|---------------|--------------|------------------------|------------------------|---------------------------------------|------------------------------------------------------------------------------------------------------------------------------------------------------------------------------------------------------------------------------------------------------------------------|---------------------------------------------------------------------------------------------------------|
| Beattie et al. Community Mobilization and Empowerment of Female Sex Workers in Karnataka State, South India: Associations With HIV and Sexually Transmitted Infection Risk     | 2014 | India         | HIV/AIDS     | Commercial sex workers | Cross-sectional survey | Community-led structural intervention | <i>Avahan initiative:</i><br>Providing safe spaces for sex workers to gather<br>Support for sex workers to identify issues to tackle as a collective<br>Formalisation & ownership of community groups & networks<br>Capacity building of community-based organizations | Peer-led outreach, referral & education<br>STI treatment & testing<br>Advocacy on behalf of sex workers |
| Chakravarthy et al. Community mobilisation programme for female sex workers in coastal Andhra Pradesh, India: processes and their effects                                      | 2012 | India         | HIV/AIDS     | Commercial sex workers | Cross-sectional survey | Community-led structural intervention | <i>Avahan initiative:</i><br>Providing safe spaces for sex workers to gather<br>Support for sex workers to identify issues to tackle as a collective<br>Formalisation & ownership of community groups & networks<br>Capacity building of community-based organizations | Peer-led outreach, referral & education<br>STI treatment & testing                                      |
| Parimi et al. Mobilising community collectivisation among female sex workers to promote STI service utilisation from the government healthcare system in Andhra Pradesh, India | 2012 | India         | HIV/AIDS     | Commercial sex workers | Cross-sectional survey | Community-led structural intervention | <i>Avahan initiative:</i><br>Providing safe spaces for sex workers to gather<br>Support for sex workers to identify issues to tackle as a collective<br>Formalisation & ownership of community groups & networks<br>Capacity building of community-based organizations | Peer-led outreach, referral & education<br>STI treatment & testing                                      |

| Author(s) and title                                                                                                                              | Year | Country focus | Health focus                               | Target population      | Type of article                          | Type of intervention                                   | Role of community groups                                                                                                                                                             | Complementary intervention components                                                                                                                                                                                                                                                                                           |
|--------------------------------------------------------------------------------------------------------------------------------------------------|------|---------------|--------------------------------------------|------------------------|------------------------------------------|--------------------------------------------------------|--------------------------------------------------------------------------------------------------------------------------------------------------------------------------------------|---------------------------------------------------------------------------------------------------------------------------------------------------------------------------------------------------------------------------------------------------------------------------------------------------------------------------------|
| Shaikh et al. Empowering communities and strengthening systems to improve transgender health: outcomes from the Pehchan programme in India       | 2016 | India         | HIV/AIDS                                   | Transgender people     | Before and after cross-sectional surveys | Community-led structural intervention                  | Organisational & technical capacity building of community-based organisations<br>Formation of transgender-run peer support groups                                                    | Community-based prevention and linkage to care interventions<br>Outreach through peers, educational materials, social media & facility-based one-on-one counselling<br>Legal, psychosocial & crisis support<br>Transgender people recruited as staff and involved in all capacity building, research & communication activities |
| Chevrier et al. 'No one was there to care for us': Ashodaya Samithi's community-led care and support for people living with HIV in Mysore, India | 2016 | India         | HIV/AIDS                                   | Commercial sex workers | Qualitative study                        | Community-led structural intervention                  | Support group meetings for sex workers living with HIV/AIDS                                                                                                                          | Volunteers help people access health services & intervene in case of ill treatment or discrimination.<br>Five-bed care home for members released from hospital.<br>Financial support for transport, meals during hospital visits, and funeral rites.<br>Advocacy on behalf of sex workers                                       |
| Siu et al. Men's Involvement in a Parenting Programme to Reduce Child Maltreatment and Gender-Based Violence: Formative Evaluation in Uganda     | 2017 | Uganda        | Child maltreatment & gender-based violence | Women and children     | Qualitative study                        | Participatory group education                          | 21 session community-based parenting programme with a core of 10 single-sex group sessions and 11 mixed-sex group sessions led in a semi-participatory way by a trained facilitator. | None                                                                                                                                                                                                                                                                                                                            |
| Hargreaves et al. Process evaluation of the Intervention with Microfinance for AIDS and Gender Equity (IMAGE) in rural South Africa.             | 2009 | South Africa  | HIV/AIDS & intimate partner violence       | Women                  | Mixed methods study                      | Participatory group education & economic strengthening | <i>IMAGE trial:</i><br>Formation & facilitation of combined microfinance & gender training groups                                                                                    | Poverty-focused microfinance<br>Election of 'natural leaders' from within groups to attend external training and develop action plans responding to local priority issues                                                                                                                                                       |

| Author(s) and title                                                                                                                                              | Year | Country focus | Health focus                         | Target population | Type of article     | Type of intervention                                   | Role of community groups                                                                                                                                                           | Complementary intervention components                                                                                                                                     |
|------------------------------------------------------------------------------------------------------------------------------------------------------------------|------|---------------|--------------------------------------|-------------------|---------------------|--------------------------------------------------------|------------------------------------------------------------------------------------------------------------------------------------------------------------------------------------|---------------------------------------------------------------------------------------------------------------------------------------------------------------------------|
| Hatcher et al. Promoting critical consciousness and social mobilization in HIV/AIDS programmes: lessons and curricular tools from a South African intervention   | 2010 | South Africa  | HIV/AIDS & intimate partner violence | Women             | Qualitative study   | Participatory group education & economic strengthening | <i>IMAGE trial:</i><br>Formation & facilitation of combined microfinance & gender training groups                                                                                  | Poverty-focused microfinance<br>Election of 'natural leaders' from within groups to attend external training and develop action plans responding to local priority issues |
| Pronyk et al. Can social capital be intentionally generated? A randomized trial from rural South Africa                                                          | 2008 | South Africa  | HIV/AIDS & intimate partner violence | Women             | Mixed methods study | Participatory group education & economic strengthening | <i>IMAGE trial:</i><br>Formation & facilitation of combined microfinance & gender training groups                                                                                  | Poverty-focused microfinance<br>Election of 'natural leaders' from within groups to attend external training and develop action plans responding to local priority issues |
| Kim et al. Understanding the Impact of a Microfinance-Based Intervention on Women's Empowerment and the Reduction of Intimate Partner Violence in South Africa   | 2007 | South Africa  | HIV/AIDS & intimate partner violence | Women             | Mixed methods study | Participatory group education & economic strengthening | <i>IMAGE trial:</i><br>Formation & facilitation of combined microfinance & gender training groups                                                                                  | Poverty-focused microfinance<br>Election of 'natural leaders' from within groups to attend external training and develop action plans responding to local priority issues |
| Gibbs et al. Jobs, food, taxis and journals: complexities of implementing Stepping Stones and Creating Futures in urban informal settlements in South Africa     | 2014 | South Africa  | HIV/AIDS & intimate partner violence | Women             | Qualitative study   | Participatory group education                          | <i>Stepping Stones intervention:</i><br>Facilitated group sessions where men & women are encouraged to reflect & critically analyse their livelihoods, gender roles & health risks | Participants are provided a journal for private reflection including questions related to group sessions                                                                  |
| Gibbs et al. 'Eh! I felt I was sabotaged!': facilitators' understandings of success in a participatory HIV and IPV prevention intervention in urban South Africa | 2015 | South Africa  | HIV/AIDS & intimate partner violence | Women             | Qualitative study   | Participatory group education                          | <i>Stepping Stones intervention:</i><br>Facilitated group sessions where men & women are encouraged to reflect & critically analyse their livelihoods, gender roles & health risks | Participants are provided a journal for private reflection including questions related to group sessions                                                                  |

| Author(s) and title                                                                                                                                                                                  | Year | Country focus  | Health focus                         | Target population | Type of article             | Type of intervention                                   | Role of community groups                                                                                                                                                                                                   | Complementary intervention components                                                                                         |
|------------------------------------------------------------------------------------------------------------------------------------------------------------------------------------------------------|------|----------------|--------------------------------------|-------------------|-----------------------------|--------------------------------------------------------|----------------------------------------------------------------------------------------------------------------------------------------------------------------------------------------------------------------------------|-------------------------------------------------------------------------------------------------------------------------------|
| Gibbs et al. Reconstructing masculinity? A qualitative evaluation of the Stepping Stones and Creating Futures interventions in urban informal settlements in South Africa                            | 2015 | South Africa   | HIV/AIDS & intimate partner violence | Women             | Qualitative study           | Participatory group education                          | <i>Stepping Stones intervention:</i> Facilitated group sessions where men & women are encouraged to reflect & critically analyse their livelihoods, gender roles & health risks                                            | Participants are provided a journal for private reflection including questions related to group sessions                      |
| Bhaird. The Complexity of Community Engagement: Developing Staff–Community Relationships in a Participatory Child Education and Women's Rights Intervention in Kolkata Slums                         | 2013 | India          | Violence against women and girls     | Women             | Qualitative study           | Participatory group education                          | Mothers of school children invited to form women's groups through which NGO staff facilitated reflection and action                                                                                                        | Shikha NGO runs non-governmental schools, women's rights groups, health clinics & vocational training programmes              |
| Falb et al. Creating opportunities through mentorship, parental involvement, and safe spaces (COMPASS) program: Multi-country study protocol to protect girls from violence in humanitarian settings | 2016 | DRC & Ethiopia | Violence against women and girls     | Girls             | Study protocol              | Participatory group education                          | Structured, facilitated group sessions in safe spaces focusing on skill-building, self-confidence, friendships, analysis of gender norms & action planning<br><br>Monthly discussion groups for caregivers on gender norms | Capacity building for health service providers & case managers<br>Targeted engagement with partners & family members of girls |
| Falb et al. Gender norms, poverty and armed conflict in Côte D'Ivoire: engaging men in women's social and economic empowerment programming                                                           | 2014 | Côte D'Ivoire  | Intimate partner violence            | Women             | Qualitative study           | Participatory group education & economic strengthening | Facilitated gender dialogue groups for members of village savings & loan associations and their spouses focusing on reflection on financial well-being & gender norms                                                      | Village savings and loan associations                                                                                         |
| Gupta et al. Gender norms and economic empowerment intervention to reduce intimate partner violence against women in rural Côte d'Ivoire: a randomized controlled pilot study                        | 2013 | Côte D'Ivoire  | Intimate partner violence            | Women             | Randomised controlled trial | Participatory group education & economic strengthening | Facilitated gender dialogue groups for members of village savings & loan associations and their spouses focusing on reflection on financial well-being & gender norms                                                      | Village savings and loan associations                                                                                         |

| Author(s) and title                                                                                                                                                                                                                                                                  | Year | Country focus | Health focus              | Target population | Type of article             | Type of intervention                               | Role of community groups                                                                                                                                                                                                                                                          | Complementary intervention components                                                                                                                                                                                                                                                                               |
|--------------------------------------------------------------------------------------------------------------------------------------------------------------------------------------------------------------------------------------------------------------------------------------|------|---------------|---------------------------|-------------------|-----------------------------|----------------------------------------------------|-----------------------------------------------------------------------------------------------------------------------------------------------------------------------------------------------------------------------------------------------------------------------------------|---------------------------------------------------------------------------------------------------------------------------------------------------------------------------------------------------------------------------------------------------------------------------------------------------------------------|
| Hossain et al. Working with men to prevent intimate partner violence in a conflict-affected setting: A pilot cluster randomized controlled trial in rural Côte d'Ivoire                                                                                                              | 2014 | Côte D'Ivoire | Intimate partner violence | Women             | Randomised controlled trial | Participatory group education                      | Facilitated men's discussion groups focusing on critically reflecting on gender norms & taking action                                                                                                                                                                             | None                                                                                                                                                                                                                                                                                                                |
| Christofides et al. A cluster randomised controlled trial to determine the effect of community mobilisation and advocacy on men's use of violence in periurban South Africa: study protocol                                                                                          | 2018 | South Africa  | Intimate partner violence | Women             | Study protocol              | Participatory group education                      | Regular facilitated community workshops to challenge inequitable & harmful ideas about manhood based on Freirean principles                                                                                                                                                       | Formation & training of Community Action Teams who mobilise community members on a voluntary basis around issues of gender transformation. Advocacy to hold government & other duty bearers to account.                                                                                                             |
| Gibbs et al. An individually randomized controlled trial to determine the effectiveness of the Women for Women International Programme in reducing intimate partner violence and strengthening livelihoods amongst women in Afghanistan: trial design, methods and baseline findings | 2018 | Afghanistan   | Intimate partner violence | Women             | Study protocol              | Participatory group education                      | Facilitated group sessions with women focusing on savings, health, rights, and networking + training in numeracy, business & vocational skills<br>Support for women with starting Self-Help Groups<br>Facilitated group sessions with men and opinion leaders around gender norms | Monthly conditional cash transfer of USD 10 per month<br>Referral services                                                                                                                                                                                                                                          |
| Naved et al. A cluster randomized controlled trial to assess the impact of SAFE on spousal violence against women and girls in slums of Dhaka, Bangladesh                                                                                                                            | 2018 | Bangladesh    | Intimate partner violence | Women             | Randomised controlled trial | Participatory group education & structural support | Facilitated group sessions with women and men                                                                                                                                                                                                                                     | Community mobilization group comprising community stakeholders trained & responsible for creating an enabling environment<br>Volunteers recruited to foster change<br>Provision of health & legal services<br>Training of marriage registrars, police, lawyers, and the judiciary.<br>National-level media advocacy |

| Author(s) and title                                                                                                                                                                                               | Year | Country focus | Health focus              | Target population    | Type of article          | Type of intervention                                               | Role of community groups                                                                                                                                                                                                                                 | Complementary intervention components                                                                                                                                                                                                                           |
|-------------------------------------------------------------------------------------------------------------------------------------------------------------------------------------------------------------------|------|---------------|---------------------------|----------------------|--------------------------|--------------------------------------------------------------------|----------------------------------------------------------------------------------------------------------------------------------------------------------------------------------------------------------------------------------------------------------|-----------------------------------------------------------------------------------------------------------------------------------------------------------------------------------------------------------------------------------------------------------------|
| Cari Jo Clark et al. Evaluating a multicomponent social behaviour change communication strategy to reduce intimate partner violence among married couples: study protocol for a cluster randomized trial in Nepal | 2017 | Nepal         | Intimate partner violence | Women                | Study protocol           | Participatory group education & mass media                         | Facilitated Radio Listening & Discussion Groups meet to critically reflect on gender norms and plan outreach activities                                                                                                                                  | Advocacy with national stakeholders<br>Behaviour change communication through mass media (radio)<br>Training of community & religious leaders                                                                                                                   |
| Babalola et al. Impact of a communication programme on female genital cutting in eastern Nigeria                                                                                                                  | 2006 | Nigeria       | Female genital cutting    | Girls                | Quasi-experimental study | Participatory group education & mass media                         | Facilitated community core groups critically reflected on women's reproductive health & developed action plans to improve women's health situation                                                                                                       | Advocacy with traditional leaders, religious leaders, local government officials, school authorities, women's groups & ruling councils<br>Discussing female genital cutting at the annual tribal 'Home and Abroad' event<br>Mass media campaign                 |
| Diop & Askew. The Effectiveness of a Community-Based Education Program on Abandoning Female Genital Mutilation/Cutting in Senegal                                                                                 | 2009 | Senegal       | Female genital cutting    | Girls                | Quasi-experimental study | Participatory group education & large-scale inter-village campaign | Participatory group sessions with women on numeracy, literacy, life skills & critical analysis of cultural & socioeconomic conditions<br><br>Women participating in groups encouraged to 'adopt' a friend/relative to share information with from groups | Intervillage meetings to exchange experiences leading to village-wide discussions promoting the idea of abandoning female genital cutting culminating in a large-scale coordinated public declaration by multiple villages on abandoning female genital cutting |
| Hoque et al. A community-based cluster randomized controlled trial (cRCT) to evaluate the impact and operational assessment of "safe motherhood and newborn health promotion package": study protocol             | 2018 | Bangladesh    | Maternal and child health | Mothers and children | Study protocol           | Group discussion & health systems strengthening                    | Establishment and capacity building of community groups & community support groups                                                                                                                                                                       | Capacity building and strengthening of health facilities & referral linkages<br>Local level advocacy & planning<br>Maternal, perinatal & community death audits                                                                                                 |

| Author(s) and title                                                                                                                                                                    | Year | Country focus                    | Health focus              | Target population    | Type of article             | Type of intervention                                   | Role of community groups                                  | Complementary intervention components                                                                          |
|----------------------------------------------------------------------------------------------------------------------------------------------------------------------------------------|------|----------------------------------|---------------------------|----------------------|-----------------------------|--------------------------------------------------------|-----------------------------------------------------------|----------------------------------------------------------------------------------------------------------------|
| Gram et al. Do Participatory Learning and Action Women's Groups Alone or Combined with Cash or Food Transfers Expand Women's Agency in Rural Nepal?                                    | 2018 | Nepal                            | Maternal and child health | Mothers and children | Randomised controlled trial | Participatory group education & economic strengthening | Women's groups practising participatory action & learning | Unconditional food transfers in one intervention arm, unconditional cash transfers in another intervention arm |
| Gram et al. The long-term impact of community mobilisation through participatory women's groups on women's agency in the household: A follow-up study to the Makwanpur trial           | 2018 | Nepal                            | Maternal and child health | Mothers and children | Quasi-experimental study    | Participatory group education                          | Women's groups practising participatory action & learning | None                                                                                                           |
| Alcock et al. Community-based health programmes: Role perceptions and experiences of female peer facilitators in Mumbai's urban slums                                                  | 2009 | India                            | Maternal and child health | Mothers and children | Qualitative study           | Participatory group education                          | Women's groups practising participatory action & learning | None                                                                                                           |
| More et al. Community Mobilization in Mumbai Slums to Improve Perinatal Care and Outcomes: A Cluster Randomized Controlled Trial                                                       | 2012 | India                            | Maternal and child health | Mothers and children | Randomised controlled trial | Participatory group education                          | Women's groups practising participatory action & learning | None                                                                                                           |
| Houweling et al. Reaching the poor with health interventions: Programme-incidence analysis of seven randomised trials of women's groups to reduce newborn mortality in Asia and Africa | 2015 | Nepal, India, Bangladesh, Malawi | Maternal and child health | Mothers and children | Mixed methods study         | Participatory group education                          | Women's groups practising participatory action & learning | Varies with the individual trial included in the set of interventions                                          |
| Morrison et al. How did formative research inform the development of a women's group intervention in rural Nepal?                                                                      | 2008 | Nepal                            | Maternal and child health | Mothers and children | Mixed methods study         | Participatory group education                          | Women's groups practising participatory action & learning | None                                                                                                           |

| Author(s) and title                                                                                                                                                                                                                                              | Year | Country focus                    | Health focus              | Target population    | Type of article             | Type of intervention                                                     | Role of community groups                                  | Complementary intervention components                                                                                                                                                                                                                             |
|------------------------------------------------------------------------------------------------------------------------------------------------------------------------------------------------------------------------------------------------------------------|------|----------------------------------|---------------------------|----------------------|-----------------------------|--------------------------------------------------------------------------|-----------------------------------------------------------|-------------------------------------------------------------------------------------------------------------------------------------------------------------------------------------------------------------------------------------------------------------------|
| Morrison et al. Women's health groups to improve perinatal care in rural Nepal                                                                                                                                                                                   | 2005 | Nepal                            | Maternal and child health | Mothers and children | Mixed methods study         | Participatory group education                                            | Women's groups practising participatory action & learning | None                                                                                                                                                                                                                                                              |
| Morrison et al. Understanding how women's groups improve maternal and newborn health in Makwanpur, Nepal: a qualitative study                                                                                                                                    | 2010 | Nepal                            | Maternal and child health | Mothers and children | Qualitative study           | Participatory group education                                            | Women's groups practising participatory action & learning | None                                                                                                                                                                                                                                                              |
| Morrison et al. Utilization and management of maternal and child health funds in rural Nepal                                                                                                                                                                     | 2010 | Nepal                            | Maternal and child health | Mothers and children | Qualitative study           | Participatory group education                                            | Women's groups practising participatory action & learning | None                                                                                                                                                                                                                                                              |
| Nair et al. Participatory women's groups and counselling through home visits to improve child growth in rural eastern India: protocol for a cluster randomised controlled trial                                                                                  | 2012 | India                            | Maternal and child health | Mothers and children | Study protocol              | Participatory group education & home visits                              | Women's groups practising participatory action & learning | Home visits with individual families                                                                                                                                                                                                                              |
| Prost et al. Women's groups practising participatory learning and action to improve maternal and newborn health in low-resource settings: a systematic review and meta-analysis                                                                                  | 2013 | Nepal, India, Bangladesh, Malawi | Maternal and child health | Mothers and children | Meta-analysis               | Participatory group education                                            | Women's groups practising participatory action & learning | Varies with the individual trial included in the set of interventions                                                                                                                                                                                             |
| Colbourn et al. Effects of quality improvement in health facilities and community mobilization through women's groups on maternal, neonatal and perinatal mortality in three districts of Malawi: MaiKhanda, a cluster randomized controlled effectiveness trial | 2013 | Malawi                           | Maternal and child health | Mothers and children | Randomised controlled trial | Participatory group education & quality improvement at health facilities | Women's groups practising participatory action & learning | One intervention arm also received a health facility quality improvement intervention focusing on conducting small tests of change using Plan-Do-Study-Act cycles, implementing change packages, conducting death reviews & received additional clinical training |

| Author(s) and title                                                                                                                                                                                                                                                                                                           | Year | Country focus | Health focus              | Target population    | Type of article             | Type of intervention                                   | Role of community groups                                  | Complementary intervention components                                                                                                        |
|-------------------------------------------------------------------------------------------------------------------------------------------------------------------------------------------------------------------------------------------------------------------------------------------------------------------------------|------|---------------|---------------------------|----------------------|-----------------------------|--------------------------------------------------------|-----------------------------------------------------------|----------------------------------------------------------------------------------------------------------------------------------------------|
| Azad et al. Effect of scaling up women's groups on birth outcomes in three rural districts in Bangladesh: a cluster-randomised controlled trial                                                                                                                                                                               | 2012 | Bangladesh    | Maternal and child health | Mothers and children | Randomised controlled trial | Participatory group education                          | Women's groups practising participatory action & learning | Clinical training for traditional birth attendants<br>Health systems strengthening                                                           |
| Rath et al. Explaining the impact of a women's group led community mobilisation intervention on maternal and newborn health outcomes: the Ekjut trial process evaluation                                                                                                                                                      | 2010 | India         | Maternal and child health | Mothers and children | Qualitative study           | Participatory group education                          | Women's groups practising participatory action & learning | Health committees allowing community members to express their opinions about local health services                                           |
| Rosato et al. Strategies developed and implemented by women's groups to improve mother and infant health and reduce mortality in rural Malawi                                                                                                                                                                                 | 2012 | Malawi        | Maternal and child health | Mothers and children | Qualitative study           | Participatory group education & home visits            | Women's groups practising participatory action & learning | Training of health workers<br>One intervention arm also received volunteer peer counsellors who identified pregnant women & made home visits |
| Rosato et al. Women's groups' perceptions of maternal health issues in rural Malawi                                                                                                                                                                                                                                           | 2006 | Malawi        | Maternal and child health | Mothers and children | Qualitative study           | Participatory group education & home visits            | Women's groups practising participatory action & learning | Training of health workers<br>One intervention arm also received volunteer peer counsellors who identified pregnant women & made home visits |
| Saville et al. Protocol of the Low Birth Weight South Asia Trial (LBWSAT), a cluster-randomised controlled trial testing impact on birth weight and infant nutrition of Participatory Learning and Action through womens groups, with and without unconditional transfers of fortified food or cash during pregnancy in Nepal | 2016 | Nepal         | Maternal and child health | Mothers and children | Study protocol              | Participatory group education & economic strengthening | Women's groups practising participatory action & learning | Unconditional food transfers in one intervention arm, unconditional cash transfers in another intervention arm                               |

| Author(s) and title                                                                                                                                                                  | Year | Country focus | Health focus              | Target population    | Type of article          | Type of intervention                            | Role of community groups                                                                                                  | Complementary intervention components                                                                                                                                                                                                 |
|--------------------------------------------------------------------------------------------------------------------------------------------------------------------------------------|------|---------------|---------------------------|----------------------|--------------------------|-------------------------------------------------|---------------------------------------------------------------------------------------------------------------------------|---------------------------------------------------------------------------------------------------------------------------------------------------------------------------------------------------------------------------------------|
| Wilner et al. Effective delivery of social and behavior change communication through a Care Group model in a supplementary feeding program                                           | 2017 | Malawi        | Maternal and child health | Mothers and children | Qualitative study        | Care group model                                | Community-based health educators held community meetings to facilitate behaviour change                                   | Health educators also conducted home visits, reported on new pregnancies, births & deaths, and disseminated health messages at food distribution points for a supplementary feeding programme to treat moderate acute malnutrition    |
| Aradeon and Doctor. Reducing rural maternal mortality and the equity gap in northern Nigeria: the public health evidence for the Community Communication Emergency Referral strategy | 2016 | Nigeria       | Maternal health           | Mothers              | Mixed methods study      | Group discussion & health systems strengthening | Community-based health volunteers held regular discussion groups to facilitate behaviour change                           | Involvement of religious leaders in developing and delivering behaviour change messages through sermons, radio and TV                                                                                                                 |
| Brazier et al. The value of building health promotion capacities within communities: Evidence from a maternal health intervention in Guinea                                          | 2014 | Guinea        | Maternal health           | Mothers              | Quasi-experimental study | Group discussion & health systems strengthening | Village safe motherhood committees & health & hygiene committees lead regular community discussions about maternal health | Village safe motherhood committee members recorded info on pregnancies, births & deaths in their villages<br>Health & hygiene committees played a role in oversight of health facility management<br>Home visits to monitor maternity |
| Saha et al. Effect of combining a health program with a microfinance-based self-help group on health behaviors and outcomes                                                          | 2015 | India         | Maternal and child health | Mothers and children | Quasi-experimental study | Group discussion & economic strengthening       | Facilitated group discussion of health issues in self-help group meetings                                                 | Self-help groups engage in income generation, savings & credit provision                                                                                                                                                              |
| Saha, Annear and Pathak. The effect of Self-Help Groups on access to maternal health services: evidence from rural India                                                             | 2013 | India         | Maternal health           | Mothers              | Cross-sectional survey   | Group discussion & economic strengthening       | Group discussion of health issues in self-help group meetings                                                             | Self-help groups engage in income generation, savings & credit provision                                                                                                                                                              |

| Author(s) and title                                                                                                                           | Year | Country focus | Health focus              | Target population    | Type of article          | Type of intervention                      | Role of community groups                                                                                                                                                                                                                          | Complementary intervention components                                                                                                                                                                                                                                                                            |
|-----------------------------------------------------------------------------------------------------------------------------------------------|------|---------------|---------------------------|----------------------|--------------------------|-------------------------------------------|---------------------------------------------------------------------------------------------------------------------------------------------------------------------------------------------------------------------------------------------------|------------------------------------------------------------------------------------------------------------------------------------------------------------------------------------------------------------------------------------------------------------------------------------------------------------------|
| George et al. Can community action improve equity for maternal health and how does it do so? Research findings from Gujarat, India            | 2018 | India         | Maternal health           | Mothers              | Mixed methods study      | Social accountability                     | Regular community meetings to elicit community concerns, deliver health information, build community ownership & foster collective decision-making<br><br>Monthly meetings convened by volunteers for problem-solving related to community issues | Poster campaign & pictorial banner to support behaviour change communication<br><br>Pictorial check list of maternal health entitlements & services used in community monitoring of health services<br><br>Provision of report cards on health services to women's collectives, ward meetings & medical officers |
| Gullo et al. Creating spaces for dialogue: a cluster-randomized evaluation of CARE's Community Score Card on health governance outcomes       | 2018 | Malawi        | Maternal and child health | Mothers and children | Quasi-experimental study | Social accountability                     | Regular community meetings to elicit community concerns, deliver health information, build community ownership & foster collective decision-making                                                                                                | Use of Community Score Card in meetings to identify and address obstacles to health coverage, quality and equity<br><br>Separate meetings with men, women, youth, health providers followed by joint meeting with community members, health services and government officials                                    |
| Mozumdar et al. Increasing knowledge of home based maternal and newborn care using self-help groups: Evidence from rural Uttar Pradesh, India | 2018 | India         | Maternal and child health | Mothers and children | Quasi-experimental study | Group discussion & economic strengthening | Peer health educator gave information to groups at weekly meetings with leaflets for 4 months                                                                                                                                                     | Self-help groups engage in income generation, savings & credit provision<br>Local federation of groups                                                                                                                                                                                                           |

| Author(s) and title                                                                                                                                                                                         | Year | Country focus                                                           | Health focus                        | Target population               | Type of article          | Type of intervention                                            | Role of community groups                                                                                  | Complementary intervention components                                                                                                                       |
|-------------------------------------------------------------------------------------------------------------------------------------------------------------------------------------------------------------|------|-------------------------------------------------------------------------|-------------------------------------|---------------------------------|--------------------------|-----------------------------------------------------------------|-----------------------------------------------------------------------------------------------------------|-------------------------------------------------------------------------------------------------------------------------------------------------------------|
| Saggurti et al. Effect of health intervention integration within women's self-help groups on collectivization and healthy practices around reproductive, maternal, neonatal and child health in rural India | 2013 | India                                                                   | Maternal and child health           | Mothers and children            | Quasi-experimental study | Group discussion & economic strengthening                       | Facilitated group discussion of maternal & newborn health issues in self-help group meetings              | Self-help groups engage in income generation, savings & credit provision                                                                                    |
| Akhund and Yousafzai. How successful are women's groups in health promotion and disease prevention? A synthesis of the literature and recommendations for developing countries                              | 2011 | Bolivia, Nepal, Pakistan, Guatemala, India, Bangladesh                  | Maternal and child health           | Mothers and children            | Narrative review         | Participatory group education                                   | Women's groups practising participatory action & learning                                                 | Varies with the individual trial included in the set of interventions                                                                                       |
| Nair et al. Mobilizing women's groups for improved maternal and newborn health: Evidence for impact, and challenges for sustainability and scale up                                                         | 2012 | Nepal, India, Bangladesh                                                | Maternal and child health           | Mothers and children            | Narrative review         | Participatory group education                                   | Women's groups practising participatory action & learning                                                 | Varies with the individual trial included in the set of interventions                                                                                       |
| Rosato et al. Community participation: lessons for maternal, newborn, and child health                                                                                                                      | 2008 | Bolivia, India, Ethiopia, Nepal, Bangladesh, Pakistan, Malawi, Tanzania | Maternal and child health           | Mothers and children            | Narrative review         | Primarily participatory group education                         | Primarily women's groups practising participatory action & learning                                       | Review also included studies on: home-based newborn care, training of mother coordinators to teach other local mothers & community health worker programmes |
| Marston et al. Community participation for transformative action on women's, children's and adolescents' health                                                                                             | 2016 | Uganda, Malawi, India, Pakistan, Bangladesh, Nepal                      | Women, children & adolescent health | Women, children and adolescents | Narrative review         | Primarily participatory group education & social accountability | Primarily women's groups practising participatory action & learning and social accountability initiatives | Review also included studies on people-centred health services                                                                                              |

| Author(s) and title                                                                                                                                                           | Year | Country focus                                                                                                                           | Health focus                 | Target population    | Type of article   | Type of intervention                                                                             | Role of community groups                                                                                          | Complementary intervention components                                                                                                                                                                                                                                                |
|-------------------------------------------------------------------------------------------------------------------------------------------------------------------------------|------|-----------------------------------------------------------------------------------------------------------------------------------------|------------------------------|----------------------|-------------------|--------------------------------------------------------------------------------------------------|-------------------------------------------------------------------------------------------------------------------|--------------------------------------------------------------------------------------------------------------------------------------------------------------------------------------------------------------------------------------------------------------------------------------|
| Farnsworth et al. Community engagement to enhance child survival and early development in low-and middle-income countries: An evidence review                                 | 2014 | India, Bangladesh, Nepal, Pakistan, Laos, Kenya, South Africa, Zambia, Honduras, Peru, Benin, Tanzania, Vietnam, Ghana, Mexico, Bolivia | Child survival & development | Children             | Systematic review | Primarily participatory group education                                                          | Primarily women's groups practising participatory action & learning                                               | Review also included studies on interventions relying on other approaches including: diffusion of innovations, health belief mode, most significant change technique, positive deviance, IMCI, socializing evidence participation action & stages of change                          |
| Howard-Grabman et al. Factors affecting effective community participation in maternal and newborn health programme planning, implementation and quality of care interventions | 2017 | Pakistan, India, Bangladesh, Nepal, Peru, Honduras, Indonesia, China, Tanzania, Kenya, Uganda                                           | Maternal and child health    | Mothers and children | Review of reviews | Primarily participatory group education                                                          | Primarily community groups engaging in reflection & action                                                        | Review interventions also included: outreach with community health workers; community-based transportation to health facilities; training of traditional health workers; stakeholder committees; mass media campaigns; community report cards; establishing demonstration households |
| Muzyamba et al. The role of Community Mobilization in maternal care provision for women in sub-Saharan Africa - A systematic review of studies using an experimental design   | 2017 | Tanzania, Malawi, Kenya, Ethiopia, Angola, Sahel, Nigeria, Sudan, South Africa, Zambia                                                  | Maternal and child health    | Mothers and children | Systematic review | Primarily participatory group education                                                          | Primarily community groups engaging in reflection & action                                                        | Review interventions also included: individual peer outreach, outreach by health care workers, involvement of traditional birth attendants, community-based transportation to health facilities                                                                                      |
| Kumar et al. Pathways from women's group-based programs to nutrition change in South Asia: A conceptual framework and literature review                                       | 2017 | India, Bangladesh, Nepal, Pakistan                                                                                                      | Maternal and child nutrition | Mothers and children | Narrative review  | Participatory group education, social accountability, micro-finance & agricultural interventions | Groups engage in participatory learning & action, social accountability, micro-finance or agricultural activities | Review interventions also included a variety of social, economic & behavioural complementary components                                                                                                                                                                              |

| Author(s) and title                                                                                                                                                                                                           | Year | Country focus                                                                                                                       | Health focus                           | Target population                                                                             | Type of article                                        | Type of intervention                                                             | Role of community groups                                                                                                                                 | Complementary intervention components                                                                                                                                                                   |
|-------------------------------------------------------------------------------------------------------------------------------------------------------------------------------------------------------------------------------|------|-------------------------------------------------------------------------------------------------------------------------------------|----------------------------------------|-----------------------------------------------------------------------------------------------|--------------------------------------------------------|----------------------------------------------------------------------------------|----------------------------------------------------------------------------------------------------------------------------------------------------------|---------------------------------------------------------------------------------------------------------------------------------------------------------------------------------------------------------|
| Cornish et al. The impact of Community Mobilisation on HIV Prevention in Middle and Low Income Countries: A Systematic Review and Critique                                                                                    | 2014 | India, Tanzania, Uganda, Zimbabwe, South Africa, Thailand, China, Brazil, Ecuador, Dominican Republic                               | HIV/AIDS                               | Commercial sex workers, men who have sex with men, adolescents, and general adult populations | Systematic review                                      | Primarily participatory group education & community-led structural interventions | Groups engage in participatory learning & action or form the basis of sex worker collectivization through the formation of community-based organisations | Review interventions also included: training of health workers, condom provision, microfinance, peer outreach, advocacy, STI services, needle exchange                                                  |
| Sebert Kuhlmann, Altman and Galavotti. The importance of community mobilization in interventions to improve sexual, reproductive, and maternal health outcomes: A review of the evidence                                      | 2016 | India, Pakistan, Bangladesh, Brazil, El Salvador, Guatemala, Burma, Cambodia, Argentina, Tanzania, Zambia, DRC, Australia, Scotland | Sexual, reproductive & maternal health | Women                                                                                         | Narrative review informed by realist review principles | Primarily participatory group education                                          | Primarily women's groups practising participatory action & learning                                                                                      | Review interventions also included: community health worker programmes, mobile clinics, peer education, training of health workers, training of traditional birth attendants, village health committees |
| Altman, Kuhlmann and Galavotti. Understanding the black box: A systematic review of the measurement of the community mobilization process in evaluations of interventions targeting sexual, reproductive, and maternal health | 2015 | South Africa, India, Tanzania, Brazil, Dominican Republic, Cambodia, United States                                                  | Sexual, reproductive & maternal health | Women                                                                                         | Systematic review                                      | Participatory group education & community-led structural interventions           | Groups engage in participatory learning & action or form the basis of sex worker collectivization through the formation of community-based organisations | Review interventions also included: training of health workers, condom provision, microfinance, peer outreach, advocacy, STI services, needle exchange                                                  |
| Berg and Denison. Interventions to reduce the prevalence of female genital mutilation/cutting in African countries                                                                                                            | 2012 | Mali, Egypt, Nigeria, Kenya, Ethiopia, Senegal, Burkina Faso                                                                        | Female genital cutting                 | Girls                                                                                         | Systematic review                                      | Primarily participatory group education                                          | Community groups engage in deliberation & action planning                                                                                                | Review interventions also included: identification of role models, classroom education, multimedia campaigns, advocacy, engagement with community leaders                                               |

| Author(s) and title                                                                         | Year | Country focus                                         | Health focus                     | Target population | Type of article  | Type of intervention                    | Role of community groups                                                          | Complementary intervention components                                                                                                                                                           |
|---------------------------------------------------------------------------------------------|------|-------------------------------------------------------|----------------------------------|-------------------|------------------|-----------------------------------------|-----------------------------------------------------------------------------------|-------------------------------------------------------------------------------------------------------------------------------------------------------------------------------------------------|
| Ellsberg et al. Prevention of violence against women and girls: what does the evidence say? | 2015 | Uganda, Ethiopia, India, Kenya, South Africa, Senegal | Violence against women and girls | Women and girls   | Narrative review | Primarily participatory group education | Facilitated groups of women & men engage in reflection & action over gender norms | Review interventions also included: livelihood programmes, support for girls staying in school, self-defence classes, social marketing campaigns, individual volunteer-based activism, advocacy |
