# Supplementary material for: Promoting women’s and children’s health through community groups in low-income and middle-income countries: a mixed-methods systematic review of mechanisms, enablers and barriers
Source: PubMed Central journal article supplement (PMC6936553; doi:10.1136/bmjgh-2019-001972), 2019-12-05
Supplement: bmjgh-2019-001972supp002.pdf [file bmjgh-2019-001972supp002.pdf]

## **Risk of bias assessment – qualitative evidence**

| Author(s) and title                                                                                                                                              | Year | Did the study aim to explore mechanisms, enablers or barriers? | Was a qualitative methodology appropriate to explore mechanisms, enablers or barriers? | Was the research design appropriate to explore mechanisms, enablers or barriers? | Was the recruitment strategy appropriate to explore mechanisms, enablers or barriers? | Was the data collected in a way that explored mechanisms, enablers or barriers? | Has the relationship between researchers and participants been adequately considered? | Have ethical issues been taken into consideration? | Was the data analysis sufficiently rigorous? | Was there a clear statement of findings? |
|------------------------------------------------------------------------------------------------------------------------------------------------------------------|------|----------------------------------------------------------------|----------------------------------------------------------------------------------------|----------------------------------------------------------------------------------|---------------------------------------------------------------------------------------|---------------------------------------------------------------------------------|---------------------------------------------------------------------------------------|----------------------------------------------------|----------------------------------------------|------------------------------------------|
| Biradavolu et al. Structural stigma, sex work and HIV: contradictions and lessons learnt from a community-led structural intervention in southern India          | 2012 | Unclear                                                        | Yes                                                                                    | Yes                                                                              | Unclear                                                                               | Yes                                                                             | No                                                                                    | Yes                                                | No                                           | Yes                                      |
| Kongelf et al. Is Scale-Up of Community Mobilisation among Sex Workers Really Possible in Complex Urban Environments? The Case of Mumbai, India                  | 2015 | Yes                                                            | Yes                                                                                    | Yes                                                                              | Yes                                                                                   | Yes                                                                             | No                                                                                    | Yes                                                | Yes                                          | Yes                                      |
| Bhattacharjee et al. Understanding the role of peer group membership in reducing HIV-related risk and vulnerability among female sex workers in Karnataka, India | 2013 | Yes                                                            | Yes                                                                                    | Yes                                                                              | Unclear                                                                               | Yes                                                                             | No                                                                                    | Yes                                                | Unclear                                      | Yes                                      |
| Chevrier et al. 'No one was there to care for us': Ashodaya Samithi's community-led care and support for people living with HIV in Mysore, India                 | 2016 | No                                                             | Yes                                                                                    | Yes                                                                              | No                                                                                    | Yes                                                                             | Yes                                                                                   | Yes                                                | No                                           | Yes                                      |

| Author(s) and title                                                                                                                                            | Year | Did the study aim to explore mechanisms, enablers or barriers? | Was a qualitative methodology appropriate to explore mechanisms, enablers or barriers? | Was the research design appropriate to explore mechanisms, enablers or barriers? | Was the recruitment strategy appropriate to explore mechanisms, enablers or barriers? | Was the data collected in a way that explored mechanisms, enablers or barriers? | Has the relationship between researchers and participants been adequately considered? | Have ethical issues been taken into consideration? | Was the data analysis sufficiently rigorous? | Was there a clear statement of findings? |
|----------------------------------------------------------------------------------------------------------------------------------------------------------------|------|----------------------------------------------------------------|----------------------------------------------------------------------------------------|----------------------------------------------------------------------------------|---------------------------------------------------------------------------------------|---------------------------------------------------------------------------------|---------------------------------------------------------------------------------------|----------------------------------------------------|----------------------------------------------|------------------------------------------|
| Siu et al. Men's Involvement in a Parenting Programme to Reduce Child Maltreatment and Gender-Based Violence: Formative Evaluation in Uganda                   | 2017 | Yes                                                            | Yes                                                                                    | Yes                                                                              | Yes                                                                                   | Yes                                                                             | Yes                                                                                   | Yes                                                | Yes                                          | Yes                                      |
| Hargreaves et al. Process evaluation of the Intervention with Microfinance for AIDS and Gender Equity (IMAGE) in rural South Africa.                           | 2009 | Yes                                                            | Yes                                                                                    | Yes                                                                              | Unclear                                                                               | Yes                                                                             | No                                                                                    | Yes                                                | No                                           | No                                       |
| Hatcher et al. Promoting critical consciousness and social mobilization in HIV/AIDS programmes: lessons and curricular tools from a South African intervention | 2010 | Yes                                                            | Yes                                                                                    | Yes                                                                              | Unclear                                                                               | Yes                                                                             | No                                                                                    | Yes                                                | Yes                                          | Yes                                      |
| Pronyk et al. Can social capital be intentionally generated? A randomized trial from rural South Africa                                                        | 2008 | Yes                                                            | Yes                                                                                    | Yes                                                                              | Unclear                                                                               | Yes                                                                             | No                                                                                    | Unclear                                            | Yes                                          | Yes                                      |

| Author(s) and title                                                                                                                                              | Year | Did the study aim to explore mechanisms, enablers or barriers? | Was a qualitative methodology appropriate to explore mechanisms, enablers or barriers? | Was the research design appropriate to explore mechanisms, enablers or barriers? | Was the recruitment strategy appropriate to explore mechanisms, enablers or barriers? | Was the data collected in a way that explored mechanisms, enablers or barriers? | Has the relationship between researchers and participants been adequately considered? | Have ethical issues been taken into consideration? | Was the data analysis sufficiently rigorous? | Was there a clear statement of findings? |
|------------------------------------------------------------------------------------------------------------------------------------------------------------------|------|----------------------------------------------------------------|----------------------------------------------------------------------------------------|----------------------------------------------------------------------------------|---------------------------------------------------------------------------------------|---------------------------------------------------------------------------------|---------------------------------------------------------------------------------------|----------------------------------------------------|----------------------------------------------|------------------------------------------|
| Kim et al. Understanding the Impact of a Microfinance-Based Intervention on Women's Empowerment and the Reduction of Intimate Partner Violence in South Africa   | 2007 | Unclear                                                        | Yes                                                                                    | Yes                                                                              | Unclear                                                                               | Yes                                                                             | Yes                                                                                   | Unclear                                            | No                                           | No                                       |
| Gibbs et al. Jobs, food, taxis and journals: complexities of implementing Stepping Stones and Creating Futures in urban informal settlements in South Africa     | 2014 | Yes                                                            | Yes                                                                                    | Yes                                                                              | Unclear                                                                               | Yes                                                                             | No                                                                                    | Yes                                                | Yes                                          | Yes                                      |
| Gibbs et al. 'Eh! I felt I was sabotaged!': facilitators' understandings of success in a participatory HIV and IPV prevention intervention in urban South Africa | 2015 | No                                                             | Yes                                                                                    | Yes                                                                              | Unclear                                                                               | Yes                                                                             | Yes                                                                                   | Yes                                                | Yes                                          | Yes                                      |

| Author(s) and title                                                                                                                                                          | Year | Did the study aim to explore mechanisms, enablers or barriers? | Was a qualitative methodology appropriate to explore mechanisms, enablers or barriers? | Was the research design appropriate to explore mechanisms, enablers or barriers? | Was the recruitment strategy appropriate to explore mechanisms, enablers or barriers? | Was the data collected in a way that explored mechanisms, enablers or barriers? | Has the relationship between researchers and participants been adequately considered? | Have ethical issues been taken into consideration? | Was the data analysis sufficiently rigorous? | Was there a clear statement of findings? |
|------------------------------------------------------------------------------------------------------------------------------------------------------------------------------|------|----------------------------------------------------------------|----------------------------------------------------------------------------------------|----------------------------------------------------------------------------------|---------------------------------------------------------------------------------------|---------------------------------------------------------------------------------|---------------------------------------------------------------------------------------|----------------------------------------------------|----------------------------------------------|------------------------------------------|
| Gibbs et al. Reconstructing masculinity? A qualitative evaluation of the Stepping Stones and Creating Futures interventions in urban informal settlements in South Africa    | 2015 | No                                                             | Yes                                                                                    | Yes                                                                              | Unclear                                                                               | Yes                                                                             | No                                                                                    | Yes                                                | Yes                                          | Yes                                      |
| Bhaird. The Complexity of Community Engagement: Developing Staff-Community Relationships in a Participatory Child Education and Women's Rights Intervention in Kolkata Slums | 2013 | Unclear                                                        | Yes                                                                                    | Yes                                                                              | Yes                                                                                   | Yes                                                                             | Yes                                                                                   | Unclear                                            | Yes                                          | Yes                                      |
| Falb et al. Gender norms, poverty and armed conflict in Côte D'Ivoire: engaging men in women's social and economic empowerment programming                                   | 2014 | Yes                                                            | Yes                                                                                    | Yes                                                                              | Yes                                                                                   | Yes                                                                             | Yes                                                                                   | Yes                                                | Yes                                          | Yes                                      |

| Author(s) and title                                                                                                                                                                    | Year | Did the study aim to explore mechanisms, enablers or barriers? | Was a qualitative methodology appropriate to explore mechanisms, enablers or barriers? | Was the research design appropriate to explore mechanisms, enablers or barriers? | Was the recruitment strategy appropriate to explore mechanisms, enablers or barriers? | Was the data collected in a way that explored mechanisms, enablers or barriers? | Has the relationship between researchers and participants been adequately considered? | Have ethical issues been taken into consideration? | Was the data analysis sufficiently rigorous? | Was there a clear statement of findings? |
|----------------------------------------------------------------------------------------------------------------------------------------------------------------------------------------|------|----------------------------------------------------------------|----------------------------------------------------------------------------------------|----------------------------------------------------------------------------------|---------------------------------------------------------------------------------------|---------------------------------------------------------------------------------|---------------------------------------------------------------------------------------|----------------------------------------------------|----------------------------------------------|------------------------------------------|
| Alcock et al. Community-based health programmes: Role perceptions and experiences of female peer facilitators in Mumbai's urban slums                                                  | 2009 | No                                                             | Yes                                                                                    | Yes                                                                              | Yes                                                                                   | Yes                                                                             | Yes                                                                                   | Yes                                                | Yes                                          | Yes                                      |
| Houweling et al. Reaching the poor with health interventions: Programme-incidence analysis of seven randomised trials of women's groups to reduce newborn mortality in Asia and Africa | 2015 | Yes                                                            | Yes                                                                                    | Yes                                                                              | Yes                                                                                   | Yes                                                                             | No                                                                                    | Yes                                                | Yes                                          | No                                       |
| Morrison et al. How did formative research inform the development of a women's group intervention in rural Nepal?                                                                      | 2008 | No                                                             | Yes                                                                                    | Yes                                                                              | Unclear                                                                               | Yes                                                                             | No                                                                                    | Yes                                                | Yes                                          | Yes                                      |
| Morrison et al. Women's health groups to improve perinatal care in rural Nepal                                                                                                         | 2005 | Yes                                                            | Yes                                                                                    | Yes                                                                              | Unclear                                                                               | Yes                                                                             | No                                                                                    | Yes                                                | Yes                                          | Yes                                      |

| Author(s) and title                                                                                                                                                      | Year | Did the study aim to explore mechanisms, enablers or barriers? | Was a qualitative methodology appropriate to explore mechanisms, enablers or barriers? | Was the research design appropriate to explore mechanisms, enablers or barriers? | Was the recruitment strategy appropriate to explore mechanisms, enablers or barriers? | Was the data collected in a way that explored mechanisms, enablers or barriers? | Has the relationship between researchers and participants been adequately considered? | Have ethical issues been taken into consideration? | Was the data analysis sufficiently rigorous? | Was there a clear statement of findings? |
|--------------------------------------------------------------------------------------------------------------------------------------------------------------------------|------|----------------------------------------------------------------|----------------------------------------------------------------------------------------|----------------------------------------------------------------------------------|---------------------------------------------------------------------------------------|---------------------------------------------------------------------------------|---------------------------------------------------------------------------------------|----------------------------------------------------|----------------------------------------------|------------------------------------------|
| Morrison et al. Understanding how women's groups improve maternal and newborn health in Makwanpur, Nepal: a qualitative study                                            | 2010 | Yes                                                            | Yes                                                                                    | Yes                                                                              | Yes                                                                                   | Yes                                                                             | Yes                                                                                   | Yes                                                | Yes                                          | Yes                                      |
| Morrison et al. Utilization and management of maternal and child health funds in rural Nepal                                                                             | 2010 | Yes                                                            | Yes                                                                                    | Yes                                                                              | Unclear                                                                               | Yes                                                                             | Yes                                                                                   | Yes                                                | Yes                                          | Yes                                      |
| Rath et al. Explaining the impact of a women's group led community mobilisation intervention on maternal and newborn health outcomes: the Ekjut trial process evaluation | 2010 | Yes                                                            | Yes                                                                                    | Yes                                                                              | Unclear                                                                               | Yes                                                                             | No                                                                                    | Yes                                                | Unclear                                      | Yes                                      |
| Rosato et al. Strategies developed and implemented by women's groups to improve mother and infant health and reduce mortality in rural Malawi                            | 2012 | Yes                                                            | Yes                                                                                    | Yes                                                                              | Yes                                                                                   | Yes                                                                             | No                                                                                    | Yes                                                | Yes                                          | Yes                                      |
| Rosato et al. Women's groups' perceptions of maternal health issues in rural Malawi                                                                                      | 2006 | Yes                                                            | Yes                                                                                    | Yes                                                                              | Yes                                                                                   | Yes                                                                             | No                                                                                    | Yes                                                | Yes                                          | Yes                                      |

| Author(s) and title                                                                                                                        | Year | Did the study aim to explore mechanisms, enablers or barriers? | Was a qualitative methodology appropriate to explore mechanisms, enablers or barriers? | Was the research design appropriate to explore mechanisms, enablers or barriers? | Was the recruitment strategy appropriate to explore mechanisms, enablers or barriers? | Was the data collected in a way that explored mechanisms, enablers or barriers? | Has the relationship between researchers and participants been adequately considered? | Have ethical issues been taken into consideration? | Was the data analysis sufficiently rigorous? | Was there a clear statement of findings? |
|--------------------------------------------------------------------------------------------------------------------------------------------|------|----------------------------------------------------------------|----------------------------------------------------------------------------------------|----------------------------------------------------------------------------------|---------------------------------------------------------------------------------------|---------------------------------------------------------------------------------|---------------------------------------------------------------------------------------|----------------------------------------------------|----------------------------------------------|------------------------------------------|
| Wilner et al. Effective delivery of social and behavior change communication through a Care Group model in a supplementary feeding program | 2017 | No                                                             | Yes                                                                                    | Yes                                                                              | Unclear                                                                               | No                                                                              | Yes                                                                                   | Yes                                                | Yes                                          | No                                       |
| George et al. Can community action improve equity for maternal health and how does it do so? Research findings from Gujarat, India         | 2018 | Yes                                                            | Yes                                                                                    | Yes                                                                              | Unclear                                                                               | Yes                                                                             | No                                                                                    | Yes                                                | Yes                                          | No                                       |
| More et al. Community Mobilization in Mumbai Slums to Improve Perinatal Care and Outcomes: A Cluster Randomized Controlled Trial           | 2012 | Yes                                                            | Yes                                                                                    | Yes                                                                              | Unclear                                                                               | Yes                                                                             | No                                                                                    | Yes                                                | Unclear                                      | Yes                                      |
| Saha et al. Effect of combining a health program with a microfinance-based self-help group on health behaviors and outcomes                | 2015 | No                                                             | Yes                                                                                    | Yes                                                                              | Unclear                                                                               | Yes                                                                             | No                                                                                    | Yes                                                | Unclear                                      | Yes                                      |



| <b>Author(s) and title</b>                                                                                                                                                              | <b>Year</b> | <b>Did the study aim to explore mechanisms, enablers or barriers?</b> | <b>Was a qualitative methodology appropriate to explore mechanisms, enablers or barriers?</b> | <b>Was the research design appropriate to explore mechanisms, enablers or barriers?</b> | <b>Was the recruitment strategy appropriate to explore mechanisms, enablers or barriers?</b> | <b>Was the data collected in a way that explored mechanisms, enablers or barriers?</b> | <b>Has the relationship between researchers and participants been adequately considered?</b> | <b>Have ethical issues been taken into consideration?</b> | <b>Was the data analysis sufficiently rigorous?</b> | <b>Was there a clear statement of findings?</b> |
|-----------------------------------------------------------------------------------------------------------------------------------------------------------------------------------------|-------------|-----------------------------------------------------------------------|-----------------------------------------------------------------------------------------------|-----------------------------------------------------------------------------------------|----------------------------------------------------------------------------------------------|----------------------------------------------------------------------------------------|----------------------------------------------------------------------------------------------|-----------------------------------------------------------|-----------------------------------------------------|-------------------------------------------------|
| Aradeon and Doctor.<br>Reducing rural maternal mortality and the equity gap in northern Nigeria: the public health evidence for the Community Communication Emergency Referral strategy | 2016        | Yes                                                                   | Yes                                                                                           | Unclear                                                                                 | Unclear                                                                                      | Unclear                                                                                | No                                                                                           | Unclear                                                   | Unclear                                             | Yes                                             |
