# Supplementary material for: Promoting women’s and children’s health through community groups in low-income and middle-income countries: a mixed-methods systematic review of mechanisms, enablers and barriers
Source: PubMed Central journal article supplement (PMC6936553; doi:10.1136/bmjgh-2019-001972), 2019-12-05
Supplement: bmjgh-2019-001972supp003.pdf [file bmjgh-2019-001972supp003.pdf]

## **Risk of bias assessment – quantitative evidence**

| Author(s) and title                                                                                                                                              | Year | Did the study aim to explore mechanisms, enablers or barriers? | Were the characteristics of the sample adequately described? | Did the study provide estimates of random variability? | Have actual p-values, not cutoffs, been reported? | Were the main findings of the study clearly described? | Was the sample representative of the target population? | Were statistical tests appropriately used? | Were the main measures used valid and reliable? | Was there adequate adjustment for confounding? | Was missing data appropriately taken into account? | Did the study present a mediation or interaction analysis of intervention effect? |
|------------------------------------------------------------------------------------------------------------------------------------------------------------------|------|----------------------------------------------------------------|--------------------------------------------------------------|--------------------------------------------------------|---------------------------------------------------|--------------------------------------------------------|---------------------------------------------------------|--------------------------------------------|-------------------------------------------------|------------------------------------------------|----------------------------------------------------|-----------------------------------------------------------------------------------|
| Azad et al. Effect of scaling up women's groups on birth outcomes in three rural districts in Bangladesh: a cluster-randomised controlled trial                  | 2012 | No                                                             | Yes                                                          | No                                                     | No                                                | Yes                                                    | Unclear                                                 | No                                         | Unclear                                         | Yes                                            | Unclear                                            | No                                                                                |
| Babalola et al. Impact of a communication programme on female genital cutting in eastern Nigeria                                                                 | 2006 | No                                                             | Yes                                                          | Yes                                                    | No                                                | Yes                                                    | Yes                                                     | Yes                                        | Unclear                                         | Partially                                      | No                                                 | No                                                                                |
| Bhattacharjee et al. Understanding the role of peer group membership in reducing HIV-related risk and vulnerability among female sex workers in Karnataka, India | 2013 | Yes                                                            | Yes                                                          | Yes                                                    | Yes                                               | Yes                                                    | Yes                                                     | Yes                                        | Unclear                                         | Unclear                                        | No                                                 | No                                                                                |
| Blankenship et al. Power, community mobilization, and condom use practices among female sex workers in Andhra Pradesh, India                                     | 2008 | Yes                                                            | Yes                                                          | Yes                                                    | No                                                | Yes                                                    | No                                                      | Yes                                        | Unclear                                         | No                                             | No                                                 | No                                                                                |

| Author(s) and title                                                                                                                                                                                  | Year | Did the study aim to explore mechanisms, enablers or barriers? | Were the characteristics of the sample adequately described? | Did the study provide estimates of random variability? | Have actual p-values, not cutoffs, been reported? | Were the main findings of the study clearly described? | Was the sample representative of the target population? | Were statistical tests appropriately used? | Were the main measures used valid and reliable? | Was there adequate adjustment for confounding? | Was missing data appropriately taken into account? | Did the study present a mediation or interaction analysis of intervention effect? |
|------------------------------------------------------------------------------------------------------------------------------------------------------------------------------------------------------|------|----------------------------------------------------------------|--------------------------------------------------------------|--------------------------------------------------------|---------------------------------------------------|--------------------------------------------------------|---------------------------------------------------------|--------------------------------------------|-------------------------------------------------|------------------------------------------------|----------------------------------------------------|-----------------------------------------------------------------------------------|
| Brazier et al. The value of building health promotion capacities within communities: Evidence from a maternal health intervention in Guinea                                                          | 2014 | Yes                                                            | Yes                                                          | Yes                                                    | No                                                | Yes                                                    | Yes                                                     | Yes                                        | Unclear                                         | Partially                                      | No                                                 | No                                                                                |
| Diop & Askew. The Effectiveness of a Community-Based Education Program on Abandoning Female Genital Mutilation/Cutting in Senegal                                                                    | 2009 | No                                                             | Yes                                                          | No                                                     | No                                                | Yes                                                    | No                                                      | Yes                                        | Unclear                                         | No                                             | No                                                 | No                                                                                |
| Gaikwad et al. How effective is community mobilisation in HIV prevention among highly diverse sex workers in urban settings? The Aastha intervention experience in Mumbai and Thane districts, India | 2012 | Yes                                                            | No                                                           | Yes                                                    | No                                                | Yes                                                    | Yes                                                     | Yes                                        | Unclear                                         | Partially                                      | No                                                 | No                                                                                |
| George et al. Can community action improve equity for maternal health and how does it do so? Research findings from Gujarat, India                                                                   | 2018 | Yes                                                            | No                                                           | Yes                                                    | Yes                                               | No                                                     | Unclear                                                 | Yes                                        | Yes                                             | Partially                                      | No                                                 | No                                                                                |

| Author(s) and title                                                                                                                                                          | Year | Did the study aim to explore mechanisms, enablers or barriers? | Were the characteristics of the sample adequately described? | Did the study provide estimates of random variability? | Have actual p-values, not cutoffs, been reported? | Were the main findings of the study clearly described? | Was the sample representative of the target population? | Were statistical tests appropriately used? | Were the main measures used valid and reliable? | Was there adequate adjustment for confounding? | Was missing data appropriately taken into account? | Did the study present a mediation or interaction analysis of intervention effect? |
|------------------------------------------------------------------------------------------------------------------------------------------------------------------------------|------|----------------------------------------------------------------|--------------------------------------------------------------|--------------------------------------------------------|---------------------------------------------------|--------------------------------------------------------|---------------------------------------------------------|--------------------------------------------|-------------------------------------------------|------------------------------------------------|----------------------------------------------------|-----------------------------------------------------------------------------------|
| Gram et al. Do Participatory Learning and Action Women's Groups Alone or Combined with Cash or Food Transfers Expand Women's Agency in Rural Nepal?                          | 2018 | Yes                                                            | Yes                                                          | Yes                                                    | No                                                | Yes                                                    | Yes                                                     | Yes                                        | Yes                                             | Yes                                            | Yes                                                | No                                                                                |
| Gram et al. The long-term impact of community mobilisation through participatory women's groups on women's agency in the household: A follow-up study to the Makwanpur trial | 2018 | Yes                                                            | Yes                                                          | Yes                                                    | No                                                | Yes                                                    | Yes                                                     | Yes                                        | Yes                                             | Yes                                            | Yes                                                | No                                                                                |
| Guha et al. Risk reduction and perceived collective efficacy and community support among female sex workers in Tamil Nadu and Maharashtra, India: the importance of context  | 2012 | Yes                                                            | No                                                           | Yes                                                    | Yes                                               | Yes                                                    | Yes                                                     | Yes                                        | Unclear                                         | Partially                                      | No                                                 | No                                                                                |

| Author(s) and title                                                                                                                                                                    | Year | Did the study aim to explore mechanisms, enablers or barriers? | Were the characteristics of the sample adequately described? | Did the study provide estimates of random variability? | Have actual p-values, not cutoffs, been reported? | Were the main findings of the study clearly described? | Was the sample representative of the target population? | Were statistical tests appropriately used? | Were the main measures used valid and reliable? | Was there adequate adjustment for confounding? | Was missing data appropriately taken into account? | Did the study present a mediation or interaction analysis of intervention effect? |
|----------------------------------------------------------------------------------------------------------------------------------------------------------------------------------------|------|----------------------------------------------------------------|--------------------------------------------------------------|--------------------------------------------------------|---------------------------------------------------|--------------------------------------------------------|---------------------------------------------------------|--------------------------------------------|-------------------------------------------------|------------------------------------------------|----------------------------------------------------|-----------------------------------------------------------------------------------|
| Gupta et al. Gender norms and economic empowerment intervention to reduce intimate partner violence against women in rural Côte d'Ivoire: a randomized controlled pilot study          | 2013 | No                                                             | Yes                                                          | Yes                                                    | Yes                                               | Yes                                                    | Yes                                                     | Yes                                        | Yes                                             | Yes                                            | Yes                                                | No                                                                                |
| Hargreaves et al. Process evaluation of the Intervention with Microfinance for AIDS and Gender Equity (IMAGE) in rural South Africa.                                                   | 2009 | Yes                                                            | Yes                                                          | No                                                     | No                                                | Yes                                                    | Unclear                                                 | Yes                                        | Yes                                             | No                                             | No                                                 | No                                                                                |
| Hossain et al. Working with men to prevent intimate partner violence in a conflict-affected setting: A pilot cluster randomized controlled trial in rural Côte d'Ivoire                | 2014 | No                                                             | Yes                                                          | Yes                                                    | No                                                | Yes                                                    | Unclear                                                 | No                                         | Yes                                             | Yes                                            | No                                                 | No                                                                                |
| Houweling et al. Reaching the poor with health interventions: Programme-incidence analysis of seven randomised trials of women's groups to reduce newborn mortality in Asia and Africa | 2015 | Yes                                                            | Yes                                                          | Yes                                                    | Yes                                               | Yes                                                    | Yes                                                     | Yes                                        | Yes                                             | Partially                                      | No                                                 | No                                                                                |

| Author(s) and title                                                                                                                                            | Year | Did the study aim to explore mechanisms, enablers or barriers? | Were the characteristics of the sample adequately described? | Did the study provide estimates of random variability? | Have actual p-values, not cutoffs, been reported? | Were the main findings of the study clearly described? | Was the sample representative of the target population? | Were statistical tests appropriately used? | Were the main measures used valid and reliable? | Was there adequate adjustment for confounding? | Was missing data appropriately taken into account? | Did the study present a mediation or interaction analysis of intervention effect? |
|----------------------------------------------------------------------------------------------------------------------------------------------------------------|------|----------------------------------------------------------------|--------------------------------------------------------------|--------------------------------------------------------|---------------------------------------------------|--------------------------------------------------------|---------------------------------------------------------|--------------------------------------------|-------------------------------------------------|------------------------------------------------|----------------------------------------------------|-----------------------------------------------------------------------------------|
| Kim et al. Understanding the Impact of a Microfinance-Based Intervention on Women's Empowerment and the Reduction of Intimate Partner Violence in South Africa | 2007 | Yes                                                            | Yes                                                          | Yes                                                    | No                                                | Yes                                                    | No                                                      | No                                         | Unclear                                         | Yes                                            | No                                                 | No                                                                                |
| Kuhlmann et al. Investing in communities: Evaluating the added value of community mobilization on HIV prevention outcomes among FSWs in India                  | 2014 | Yes                                                            | Yes                                                          | Yes                                                    | Yes                                               | Yes                                                    | Yes                                                     | Yes                                        | Yes                                             | Partially                                      | No                                                 | Yes                                                                               |
| Morrison et al. Women's health groups to improve perinatal care in rural Nepal                                                                                 | 2005 | Yes                                                            | No                                                           | No                                                     | No                                                | Yes                                                    | Yes                                                     | No                                         | Yes                                             | Yes                                            | Yes                                                | No                                                                                |
| Mozumdar et al. Increasing knowledge of home based maternal and newborn care using self-help groups: Evidence from rural Uttar Pradesh, India                  | 2018 | No                                                             | No                                                           | No                                                     | Yes                                               | Yes                                                    | Unclear                                                 | Yes                                        | Yes                                             | Partially                                      | No                                                 | No                                                                                |

| Author(s) and title                                                                                                                                                                                                            | Year | Did the study aim to explore mechanisms, enablers or barriers? | Were the characteristics of the sample adequately described? | Did the study provide estimates of random variability? | Have actual p-values, not cutoffs, been reported? | Were the main findings of the study clearly described? | Was the sample representative of the target population? | Were statistical tests appropriately used? | Were the main measures used valid and reliable? | Was there adequate adjustment for confounding? | Was missing data appropriately taken into account? | Did the study present a mediation or interaction analysis of intervention effect? |
|--------------------------------------------------------------------------------------------------------------------------------------------------------------------------------------------------------------------------------|------|----------------------------------------------------------------|--------------------------------------------------------------|--------------------------------------------------------|---------------------------------------------------|--------------------------------------------------------|---------------------------------------------------------|--------------------------------------------|-------------------------------------------------|------------------------------------------------|----------------------------------------------------|-----------------------------------------------------------------------------------|
| Nagarajan et al. Female sex worker's participation in the community mobilization process: Two distinct forms of participations and associated contextual factors                                                               | 2014 | Yes                                                            | Yes                                                          | Yes                                                    | No                                                | No                                                     | Yes                                                     | Yes                                        | No                                              | No                                             | No                                                 | No                                                                                |
| Narayanan et al. Monitoring community mobilisation and organisational capacity among high-risk groups in a large-scale HIV prevention programme in India: selected findings using a Community Ownership and Preparedness Index | 2012 | Yes                                                            | Yes                                                          | No                                                     | No                                                | No                                                     | Unclear                                                 | No                                         | Unclear                                         | No                                             | No                                                 | No                                                                                |
| Naved et al. A cluster randomized controlled trial to assess the impact of SAFE on spousal violence against women and girls in slums of Dhaka, Bangladesh                                                                      | 2018 | No                                                             | Yes                                                          | Yes                                                    | No                                                | Yes                                                    | Yes                                                     | Yes                                        | Yes                                             | Yes                                            | No                                                 | No                                                                                |

| Author(s) and title                                                                                                                                                                                                                  | Year | Did the study aim to explore mechanisms, enablers or barriers? | Were the characteristics of the sample adequately described? | Did the study provide estimates of random variability? | Have actual p-values, not cutoffs, been reported? | Were the main findings of the study clearly described? | Was the sample representative of the target population? | Were statistical tests appropriately used? | Were the main measures used valid and reliable? | Was there adequate adjustment for confounding? | Was missing data appropriately taken into account? | Did the study present a mediation or interaction analysis of intervention effect? |
|--------------------------------------------------------------------------------------------------------------------------------------------------------------------------------------------------------------------------------------|------|----------------------------------------------------------------|--------------------------------------------------------------|--------------------------------------------------------|---------------------------------------------------|--------------------------------------------------------|---------------------------------------------------------|--------------------------------------------|-------------------------------------------------|------------------------------------------------|----------------------------------------------------|-----------------------------------------------------------------------------------|
| Pronyk et al. Can social capital be intentionally generated? A randomized trial from rural South Africa                                                                                                                              | 2008 | Yes                                                            | Yes                                                          | Yes                                                    | Yes                                               | Yes                                                    | No                                                      | No                                         | Yes                                             | Yes                                            | No                                                 | No                                                                                |
| Prost et al. Women's groups practising participatory learning and action to improve maternal and newborn health in low-resource settings: a systematic review and meta-analysis                                                      | 2013 | No                                                             | Yes                                                          | Yes                                                    | Yes                                               | Yes                                                    | Yes                                                     | Yes                                        | Yes                                             | No                                             | Yes                                                | Yes                                                                               |
| Saggurti et al. Community collectivization and its association with consistent condom use and STI treatment-seeking behaviors among female sex workers and high-risk men who have sex with men/transgenders in Andhra Pradesh, India | 2013 | Yes                                                            | Yes                                                          | Yes                                                    | No                                                | Yes                                                    | Yes                                                     | Yes                                        | Yes                                             | No                                             | No                                                 | No                                                                                |

| Author(s) and title                                                                                                                                                                                         | Year | Did the study aim to explore mechanisms, enablers or barriers? | Were the characteristics of the sample adequately described? | Did the study provide estimates of random variability? | Have actual p-values, not cutoffs, been reported? | Were the main findings of the study clearly described? | Was the sample representative of the target population? | Were statistical tests appropriately used? | Were the main measures used valid and reliable? | Was there adequate adjustment for confounding? | Was missing data appropriately taken into account? | Did the study present a mediation or interaction analysis of intervention effect? |
|-------------------------------------------------------------------------------------------------------------------------------------------------------------------------------------------------------------|------|----------------------------------------------------------------|--------------------------------------------------------------|--------------------------------------------------------|---------------------------------------------------|--------------------------------------------------------|---------------------------------------------------------|--------------------------------------------|-------------------------------------------------|------------------------------------------------|----------------------------------------------------|-----------------------------------------------------------------------------------|
| Saggurti et al. Effect of health intervention integration within women's self-help groups on collectivization and healthy practices around reproductive, maternal, neonatal and child health in rural India | 2013 | No                                                             | Yes                                                          | Yes                                                    | Yes                                               | Yes                                                    | Yes                                                     | Yes                                        | Unclear                                         | Partially                                      | Yes                                                | No                                                                                |
| Saha et al. Effect of combining a health program with a microfinance-based self-help group on health behaviors and outcomes                                                                                 | 2015 | No                                                             | Yes                                                          | Yes                                                    | No                                                | Yes                                                    | Unclear                                                 | Yes                                        | Yes                                             | Partially                                      | No                                                 | No                                                                                |
| Saha, Annear and Pathak. The effect of Self-Help Groups on access to maternal health services: evidence from rural India                                                                                    | 2013 | No                                                             | Yes                                                          | Yes                                                    | No                                                | Yes                                                    | Yes                                                     | Yes                                        | Yes                                             | Partially                                      | No                                                 | No                                                                                |
| Shaikh et al. Empowering communities and strengthening systems to improve transgender health: outcomes from the Pehchan programme in India                                                                  | 2016 | No                                                             | Yes                                                          | No                                                     | No                                                | Yes                                                    | Yes                                                     | No                                         | No                                              | No                                             | No                                                 | No                                                                                |

| Author(s) and title                                                                                                                                                        | Year | Did the study aim to explore mechanisms, enablers or barriers? | Were the characteristics of the sample adequately described? | Did the study provide estimates of random variability? | Have actual p-values, not cutoffs, been reported? | Were the main findings of the study clearly described? | Was the sample representative of the target population? | Were statistical tests appropriately used? | Were the main measures used valid and reliable? | Was there adequate adjustment for confounding? | Was missing data appropriately taken into account? | Did the study present a mediation or interaction analysis of intervention effect? |
|----------------------------------------------------------------------------------------------------------------------------------------------------------------------------|------|----------------------------------------------------------------|--------------------------------------------------------------|--------------------------------------------------------|---------------------------------------------------|--------------------------------------------------------|---------------------------------------------------------|--------------------------------------------|-------------------------------------------------|------------------------------------------------|----------------------------------------------------|-----------------------------------------------------------------------------------|
| Vejella et al. Community Collectivization and Consistent Condom Use Among Female Sex Workers in Southern India: Evidence from Two Rounds of Behavioral Tracking Surveys    | 2016 | Yes                                                            | Yes                                                          | Yes                                                    | Yes                                               | Yes                                                    | Yes                                                     | Yes                                        | Yes                                             | No                                             | No                                                 | No                                                                                |
| Wilner et al. Effective delivery of social and behavior change communication through a Care Group model in a supplementary feeding program                                 | 2017 | No                                                             | No                                                           | No                                                     | No                                                | No                                                     | Unclear                                                 | No                                         | No                                              | No                                             | No                                                 | No                                                                                |
| Beattie et al. Community Mobilization and Empowerment of Female Sex Workers in Karnataka State, South India: Associations With HIV and Sexually Transmitted Infection Risk | 2014 | Yes                                                            | Yes                                                          | Yes                                                    | Yes                                               | Yes                                                    | Yes                                                     | Yes                                        | Yes                                             | No                                             | No                                                 | Yes                                                                               |
| Chakravarthy et al. Community mobilisation programme for female sex workers in coastal Andhra Pradesh, India: processes and their effects                                  | 2012 | Yes                                                            | No                                                           | No                                                     | Yes                                               | Yes                                                    | Unclear                                                 | Yes                                        | Yes                                             | No                                             | No                                                 | No                                                                                |

| Author(s) and title                                                                                                                                                                  | Year | Did the study aim to explore mechanisms, enablers or barriers? | Were the characteristics of the sample adequately described? | Did the study provide estimates of random variability? | Have actual p-values, not cutoffs, been reported? | Were the main findings of the study clearly described? | Was the sample representative of the target population? | Were statistical tests appropriately used? | Were the main measures used valid and reliable? | Was there adequate adjustment for confounding? | Was missing data appropriately taken into account? | Did the study present a mediation or interaction analysis of intervention effect? |
|--------------------------------------------------------------------------------------------------------------------------------------------------------------------------------------|------|----------------------------------------------------------------|--------------------------------------------------------------|--------------------------------------------------------|---------------------------------------------------|--------------------------------------------------------|---------------------------------------------------------|--------------------------------------------|-------------------------------------------------|------------------------------------------------|----------------------------------------------------|-----------------------------------------------------------------------------------|
| Parimi et al. Mobilising community collectivisation among female sex workers to promote STI service utilisation from the government healthcare system in Andhra Pradesh, India       | 2012 | Yes                                                            | Yes                                                          | Yes                                                    | No                                                | Yes                                                    | Yes                                                     | Yes                                        | Yes                                             | No                                             | No                                                 | No                                                                                |
| Aradeon and Doctor. Reducing rural maternal mortality and the equity gap in northern Nigeria: the public health evidence for the Community Communication Emergency Referral strategy | 2016 | Yes                                                            | No                                                           | No                                                     | No                                                | Yes                                                    | Unclear                                                 | No                                         | Yes                                             | No                                             | No                                                 | No                                                                                |
| Gullo et al. Creating spaces for dialogue: a cluster-randomized evaluation of CARE's Community Score Card on health governance outcomes                                              | 2018 | Yes                                                            | Yes                                                          | Yes                                                    | Yes                                               | Yes                                                    | Yes                                                     | No                                         | Yes                                             | Partial                                        | Yes                                                | No                                                                                |
